# Supplementary material
Source: publisher figshare collection journal article supplement (https://tandf.figshare.com/ndownloader/files/17830019)
Supplement: Supplementary file 1 [file 17830019]

Table A1. ICD-9-CM and ICD-10-CM Codes for the Identification of Atrial Fibrillation and Obesity and Morbid Obesity

| **Study Measure** | **Code** | **Description** |
| --- | --- | --- |
| Atrial fibrillation | **ICD-9-CM Diagnosis Codes** | |
| 427.31 | Atrial fibrillation |
| **ICD-10-CM Diagnosis Codes** | |
| I48.0 | Paroxysmal atrial fibrillation |
| I48.1 | Persistent atrial fibrillation |
| I48.2 | Chronic atrial fibrillation |
| I48.91 | Unspecified atrial fibrillation |
| Obesity (BMI ≥30) | **ICD-9-CM Diagnosis Codes** | |
| 278.00 | Obesity, unspecified |
| 278.01 | Morbid obesity |
| 278.03 | Obesity hypoventilation syndrome |
| V85.30 | Body Mass Index 30.0-30.9, adult |
| V85.31 | Body Mass Index 31.0-31.9, adult |
| V85.32 | Body Mass Index 32.0-32.9, adult |
| V85.33 | Body Mass Index 33.0-33.9, adult |
| V85.34 | Body Mass Index 34.0-34.9, adult |
| V85.35 | Body Mass Index 35.0-35.9, adult |
| V85.36 | Body Mass Index 36.0-36.9, adult |
| V85.37 | Body Mass Index 37.0-37.9, adult |
| V85.38 | Body Mass Index 38.0-38.9, adult |
| V85.39 | Body Mass Index 39.0-39.9, adult |
| V85.41 | Body Mass Index 40.0-44.9, adult |
| V85.42 | Body Mass Index 45.0-49.9, adult |
| V85.43 | Body Mass Index 50.0-59.9, adult |
| V85.44 | Body Mass Index 60.0-69.9, adult |
| V85.45 | Body Mass Index 70 and over, adult |
| **ICD-10-CM Diagnosis Codes** | |
| E66.09 | Other obesity due to excess calories |
| E66.1 | Drug-induced obesity |
| E66.2 | Morbid (severe) obesity with alveolar hypoventilation |
| E66.8 | Other obesity |
| E66.9 | Obesity, unspecified |
| Z68.30 | Body mass index (BMI) 30.0-30.9, adult |
| Z68.31 | Body mass index (BMI) 31.0-31.9, adult |
| Z68.32 | Body mass index (BMI) 32.0-32.9, adult |
| Z68.33 | Body mass index (BMI) 33.0-33.9, adult |
| Z68.34 | Body mass index (BMI) 34.0-34.9, adult |
| Z68.35 | Body mass index (BMI) 35.0-35.9, adult |
| Z68.36 | Body mass index (BMI) 36.0-36.9, adult |
| Z68.37 | Body mass index (BMI) 37.0-37.9, adult |
| Z68.38 | Body mass index (BMI) 38.0-38.9, adult |
| Z68.39 | Body mass index (BMI) 39.0-39.9, adult |
| Z68.41 | Body mass index (BMI) 40.0-44.9, adult |
| Z68.42 | Body mass index (BMI) 45.0-49.9, adult |
| Z68.43 | Body mass index (BMI) 50-59.9, adult |
| Z68.44 | Body mass index (BMI) 60.0-69.9, adult |
| Z68.45 | Body mass index (BMI) 70 or greater, adult |
| Morbid obesity (BMI ≥40) | **ICD-9-CM Diagnosis Codes** | |
| 278.01 | Morbid obesity |
| V85.41 | Body Mass Index 40.0-44.9, adult |
| V85.42 | Body Mass Index 45.0-49.9, adult |
| V85.43 | Body Mass Index 50.0-59.9, adult |
| V85.44 | Body Mass Index 60.0-69.9, adult |
| V85.45 | Body Mass Index 70 and over, adult |
| **ICD-10-CM Diagnosis Codes** | |
| E66.01 | Morbid (severe) obesity due to excess calories |
| E66.2 | Morbid (severe) obesity with alveolar hypoventilation |
| Z68.41 | Body mass index (BMI) 40.0-44.9, adult |
| Z68.42 | Body mass index (BMI) 45.0-49.9, adult |
| Z68.43 | Body mass index (BMI) 50-59.9, adult |
| Z68.44 | Body mass index (BMI) 60.0-69.9, adult |
| Z68.45 | Body mass index (BMI) 70 or greater, adult |

BMI = body mass index; ICD = International Classification of Diseases.
